# Supplementary material for: On-line liquid chromatography neutral loss-triggered electron transfer dissociationmass spectrometry for the targeted analysis of citrullinated peptides
Source: Royal Society of Chemistry journal article supplement (doi:10.1039/c0ay00414f), 2010-12-02
Supplement: c0ay00414f.pdf [file c0ay00414f.pdf]

Peptide 1  
 ILNXTSFAK

2+ ions

1A

| CID |        |                    | ETD |        |                    |
|-----|--------|--------------------|-----|--------|--------------------|
|     | m/z    | relative intensity |     | m/z    | relative intensity |
| b2  | 227.22 | 11.42              | c5° | 615.37 | 3.51               |
| b4  | 498.29 | 7.29               | c6° | 702.4  | 27.42              |
| b5  | 599.43 | 2.87               | c7  | 850.48 | 25.03              |
| b6  | 686.38 | 2.5                | c8  | 921.51 | 43.77              |
| b7  | 833.51 | 2.3                |     |        |                    |
| b8  | 904.5  | 3.15               | z4  | 437.24 | 20.57              |
|     |        |                    | z5  | 538.29 | 21.47              |
| y2  | 218.19 | 4.24               | z6° | 694.36 | 27.45              |
| y4  | 452.31 | 9.68               | z7° | 808.41 | 21.43              |
| y5  | 553.26 | 21.56              | z8° | 921.51 | 43.77              |
| y6  | 710.43 | 6.78               |     |        |                    |
| y7  | 824.45 | 61.39              |     |        |                    |
| y8  | 937.5  | 4.16               |     |        |                    |

Figure  
 1B

Peptide 2  
 VVEXHQ SACK

3+ ions

| CID    |        |                    | ETD |         |                    |
|--------|--------|--------------------|-----|---------|--------------------|
|        | m/z    | relative intensity |     | m/z     | relative intensity |
| b2     | 199.06 | 14.08              | c2  | 216.17  | 12.46              |
| b3     | 328.22 | 1.58               | c3  | 345.21  | 45.01              |
| b4     | 485.37 | 0.85               | c4  | 502.3   | 30.73              |
|        |        |                    | c5  | 639.36  | 57.15              |
| y5     | 536.29 | 1.58               | c6  | 767.41  | 48.96              |
| y6     | 673.34 | 3.34               | c7  | 854.45  | 19.31              |
| [y8]2+ | 480.19 | 8.11               | c8  | 925.5   | 4.35               |
| [y9]2+ | 529.8  | 34.1               | c9  | 1028.49 | 11.36              |
|        |        |                    |     |         |                    |
|        |        |                    | z3° | 305.14  | 5.81               |
|        |        |                    | z4° | 392.17  | 26.91              |
|        |        |                    | z5° | 520.23  | 34.64              |
|        |        |                    | z6° | 657.29  | 23.73              |
|        |        |                    | z7° | 814.37  | 36.78              |
|        |        |                    | z8° | 943.41  | 15.64              |
|        |        |                    | z9  | 1043.49 | 8.46               |

Peptide 2  
 (VVEXHQSACK)<sub>2</sub>

4+ dimer ions 1C

| ETD     |        |                    |
|---------|--------|--------------------|
|         | m/z    | relative intensity |
| c3      | 345.21 | 7.93               |
| c4      | 502.3  | 18.49              |
| c5      | 639.36 | 22.68              |
| c6      | 767.4  | 10                 |
| c7      | 854.44 | 6.24               |
| c8      | 925.47 | 3.98               |
| Z6° - H | 656.28 | 8.12               |
| Z7° - H | 813.36 | 9.95               |
| Z8° - H | 942.42 | 5.66               |

Figure  
 1D

Peptide 3  
 LYNLHGDXSYVLSK

2+ ions

| CID |         |                    | ETD  |         |                    |
|-----|---------|--------------------|------|---------|--------------------|
|     | m/z     | relative intensity |      | m/z     | relative intensity |
| b4  | 504.35  | 1.26               | c8°  | 986.49  | 8.79               |
| b8  | 970.52  | 0.67               | c9°  | 1073.52 | 14.47              |
| b9  | 1057.47 | 0.54               | c10° | 1236.59 | 15.41              |
| b10 | 1220.51 | 0.96               | c11° | 1335.66 | 8.05               |
| b11 | 1319.56 | 2.96               | c12  | 1448.73 | 3.22               |
| b12 | 1432.61 | 2.77               | c13  | 1536.79 | 5.74               |
| b13 | 1519.78 | 0.63               |      |         |                    |
| y7  | 853.5   | 1.51               | z7°  | 837.46  | 3.05               |
| y8  | 968.59  | 0.97               | z8   | 953.5   | 19.4               |
| y9  | 1025.52 | 8.94               | z9   | 1010.52 | 8.9                |
| y10 | 1162.55 | 5.87               | z10° | 1146.57 | 12.22              |
| y11 | 1275.57 | 0.9                | z11° | 1259.65 | 9.93               |
| y12 | 1389.62 | 2.5                | z12° | 1373.69 | 11.84              |
|     |         |                    | z13  | 1537.77 | 6.15               |

Figure  
 1E

Peptide 3

3+ ions

LYNLHGDXSYVLSK

| CID |         |                    | ETD  |         |                    |
|-----|---------|--------------------|------|---------|--------------------|
|     | m/z     | relative intensity |      | m/z     | relative intensity |
| b7  | 813.42  | 1.15               | c3   | 408.22  | 14.38              |
| b8  | 970.56  | 0.27               | c4   | 521.31  | 59.52              |
| b9  | 1057.45 | 0.25               | c5   | 658.37  | 36.35              |
| b10 | 1220.61 | 0.06               | c6   | 715.39  | 37.7               |
| b11 | 1319.69 | 0.08               | c7   | 830.42  | 10.21              |
| y6  | 696.48  | 24.98              | c8   | 987.5   | 53.93              |
| y7  | 853.53  | 0.75               | c9   | 1074.53 | 53.95              |
| y8  | 968.47  | 0.1                | c10  | 1237.58 | 15.35              |
| y9  | 1025.53 | 0.97               | c11  | 1336.67 | 24.15              |
| y10 | 1162.56 | 0.15               | c12  | 1449.74 | 6.08               |
| y11 | 1275.59 | 0.01               | c13  | 1536.77 | 8.86               |
|     |         |                    | z3°  | 331.21  | 24.19              |
|     |         |                    | z5°  | 593.34  | 58.69              |
|     |         |                    | z6°  | 680.37  | 47.38              |
|     |         |                    | z8°  | 952.49  | 29.99              |
|     |         |                    | z9°  | 1009.5  | 33.11              |
|     |         |                    | z10° | 1146.57 | 51.31              |
|     |         |                    | z11° | 1259.66 | 10.75              |
|     |         |                    | z12  | 1374.73 | 8.03               |
|     |         |                    | z13° | 1536.77 | 8.86               |

Figure  
 1F

Peptide 4

3+ ions

IHAXEEIFDSXGNPTVEVDLFTSK

| CID     |         |                    | ETD      |         |                    |
|---------|---------|--------------------|----------|---------|--------------------|
|         | m/z     | relative intensity |          | m/z     | relative intensity |
| b3      | 322.32  | 1.01               | c2       | 268.17  | 3.19               |
| b4      | 479.32  | 1.6                | c3       | 339.21  | 2.62               |
| b5      | 608.33  | 1.46               | c4       | 496.3   | 13.24              |
| b6      | 737.44  | 5.7                | c5       | 625.34  | 21.44              |
| b7      | 850.47  | 23.62              | c6       | 754.38  | 16.72              |
| b8      | 997.49  | 14.83              | c7       | 867.46  | 7.87               |
| b9      | 1112.4  | 16.7               | c8       | 1014.53 | 16.97              |
| b10     | 1199.48 | 8.28               | c9       | 1129.56 | 15.57              |
| b11     | 1356.57 | 4.86               | c10      | 1216.59 | 5.05               |
| b12     | 1413.63 | 5.27               | c11      | 1373.67 | 20.07              |
| b13     | 1527.71 | 22.67              | c12      | 1430.7  | 23.15              |
| y3      | 335.36  | 8.66               | c14      | 1641.79 | 11.18              |
| y4      | 482.3   | 13.4               | c15      | 1742.83 | 16.25              |
| y5      | 595.45  | 7.37               | c16      | 1841.93 | 1.97               |
| y6      | 710.43  | 21.47              | c17      | 1970.95 | 2.58               |
| y7      | 809.46  | 18.91              | [c21]2+  | 1223.11 | 5.15               |
| y8      | 938.53  | 63.63              | [c22]2+  | 1273.63 | 13.45              |
| y9      | 1037.6  | 24.13              | [c23]2+  | 1317.14 | 29.59              |
| y10     | 1138.55 | 8.12               | z3       | 320.17  | 1.43               |
| y11     | 1235.6  | 100                | z4°      | 467.26  | 1.26               |
| y12     | 1349.65 | 6.5                | z5°      | 579.33  | 2.75               |
| y13     | 1406.69 | 24.28              | z6°      | 695.35  | 12.25              |
| [y18]2+ | 1013.48 | 4.85               | z7°      | 793.43  | 11.14              |
|         |         |                    | z9°      | 1021.53 | 25.7               |
|         |         |                    | z10°     | 1122.57 | 3.84               |
|         |         |                    | z12°     | 1333.67 | 22.83              |
|         |         |                    | z14°     | 1547.79 | 14.98              |
|         |         |                    | z15°     | 1634.82 | 6.5                |
|         |         |                    | z16      | 1749.83 | 12.25              |
|         |         |                    | [z23°]2+ | 1317.12 | 29.59              |
